# Supplementary material
Source: PubMed Central journal article supplement (PMC3567578)
Supplement: i1913-701X-145-5-222-a01.pdf [file i1913-701X-145-5-222-a01.pdf]

# Appendix 1: Algorithm of Pain Assessment and Management of the Child used at The Hospital for Sick Children

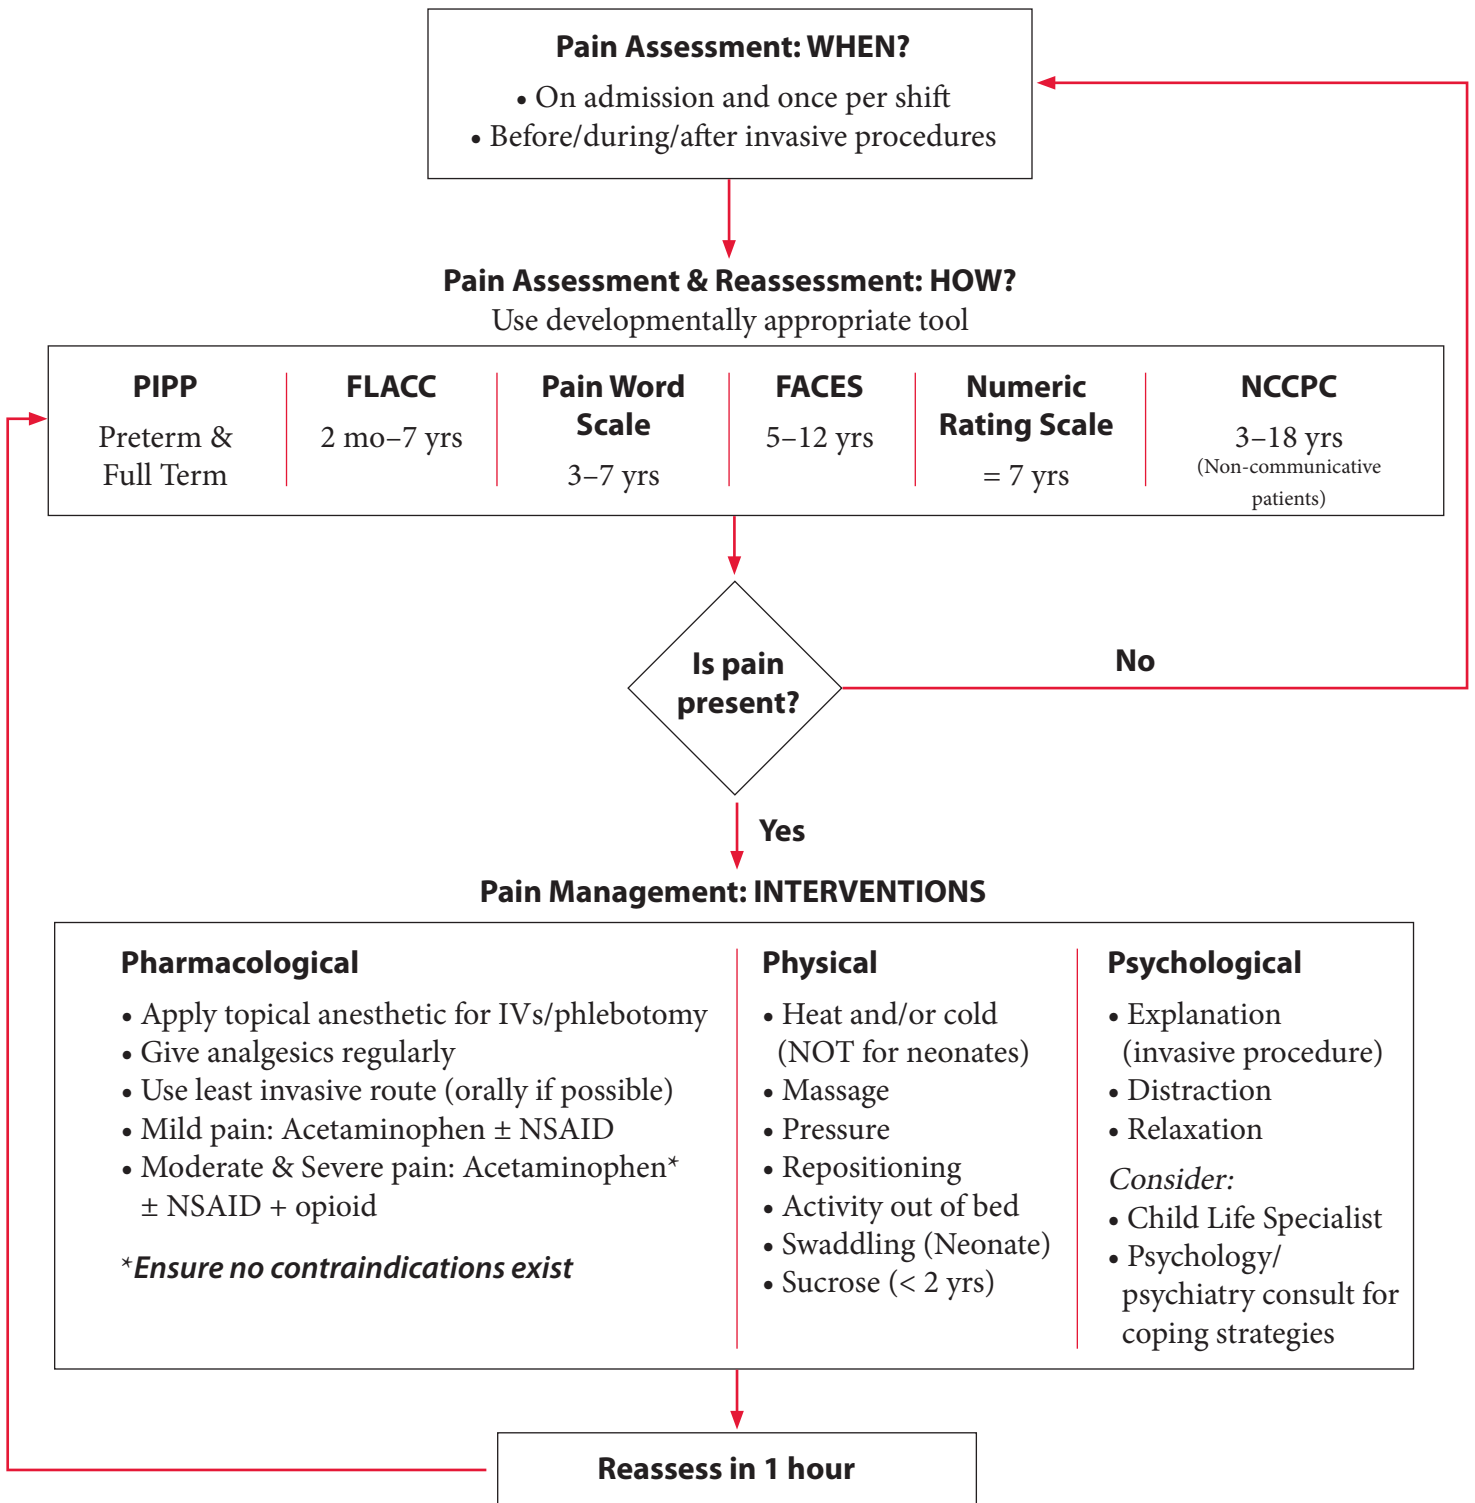

Algorithm based on the Hospital for Sick Children's Pain Assessment Policy and Pain Management Clinical Practice Guideline.
